# Supplementary material for: Functional and Expression Analyses of the Pneumocystis MAT Genes Suggest Obligate Sexuality through Primary Homothallism within Host Lungs
Source: PubMed Central journal article supplement (PMC5821091; doi:10.1128/mbio.02201-17), 2018-02-20
Supplement: mbo001183738st1.pdf [file mbo001183738st1.pdf]

**Table S1.** Conditions for PCR amplifications.

| Target, use <sup>a</sup>           | Primer name                    | Primer 5'-3' nucleotide sequence                                        | Annealing temperature (°C) | Extension time (min) | Mg <sup>2+</sup> final concentration (mM) | PCR product size (bp) |
|------------------------------------|--------------------------------|-------------------------------------------------------------------------|----------------------------|----------------------|-------------------------------------------|-----------------------|
| Pj matMc ORF, cloning <sup>b</sup> | pjmatMcstaSAL<br>pjmatMcendBAM | CCCCCGTCGACATGCATGCACAGTTAGAATTC<br>CGCGGGATCCTCATACCCACAGTGGGGCTG      | 58                         | 1                    | 3                                         | 777                   |
| Pj matMi ORF, cloning              | pjmatMistaSAL<br>pjmatMiendBAM | CCCCCGTCGACATGCTTCCAGTATGTTTTGTTC<br>CGCGGGATCCTCAATGTGGCTCAGTAGAATATAC | 55                         | 1                    | 3                                         | 234                   |
| Pj matPi ORF, cloning              | pjmatPistaSAL<br>pjmatPiendBAM | CCCCCGTCGACATGTTGTCTATTGGGTCATTAG<br>CGCGGGATCCTTATTCCGAATTGGAAAACAC    | 55                         | 1                    | 3                                         | 718                   |
| Pc matMc ORF, cloning              | pcmatMcstaSAL<br>pcmatMcendBAM | CCCCCGTCGACATGCCATATGCACATCTTG<br>CCCCGGGATCCTTAGCCCAAAGTCCCGTAG        | 56                         | 1                    | 3                                         | 720                   |
| Pc matMi ORF, cloning              | pcmatMistaSAL<br>pcmatMiendBAM | CCCCCGTCGACATGAATGTTCTTAACCATTTG<br>CGCGGGATCCTTAGAAGGAAAACCAATGG       | 56                         | 1                    | 3                                         | 237                   |
| Pc matPi ORF, cloning              | pcmatPistaSAL<br>pcmatPiendBAM | CCCCCGTCGACATGTCAGAGGAGGTATATG<br>CGCGGGATCCTTATTGAGAATTAGCGAATACC      | 58                         | 1                    | 3                                         | 715                   |
| Pj matMc ORF, first round          | pjmatMcstart<br>pjmatMcend     | ATGCATGCACAGTTAGAATTC<br>TCATACCCACAGTGGGGCTG                           | 58                         | 1                    | 3                                         | 755                   |
| Pj matMi ORF, first round          | pjmatMistart<br>pjmatMiend     | ATGCTTCCAGTATGTTTTGTTC<br>TCAATGTGGCTCAGTAGAATATAC                      | 58                         | 1                    | 3                                         | 212                   |
| Pj matPi ORF, first round          | pjmatPistar<br>pjmatPiend      | ATGTTGCTCATTGGGTCATTA<br>TTATTCCGAATTGGAAAACAC                          | 54                         | 1                    | 3                                         | 696                   |
| Pj matMc ORF, second round         | pjmatMcstartNEST<br>pjmatMcend | CTACCAAATGAAAACAGAAAC<br>TCATACCCACAGTGGGGCTG                           | 60                         | 1                    | 3                                         | 731                   |
| Pj matMi ORF, second round         | pjmatMistartNEST<br>pjmatMiend | GATAATTTTGCTAATAACGG<br>TCAATGTGGCTCAGTAGAATATAC                        | 54                         | 1                    | 3                                         | 189                   |
| Pj matPi ORF, second round         | pjmatPistartNEST<br>pjmatPiend | TGTTTCATGTATGGATTGAG<br>TTATTCCGAATTGGAAAACAC                           | 54                         | 1                    | 3                                         | 673                   |
| Pj MAT locus                       | pjmatPiend<br>pjmatMiend       | TTATTCCGAATTGGAAAACAC<br>TCAATGTGGCTCAGTAGAATATAC                       | 52                         | 11                   | 1.75                                      | 10157                 |
| Pj MAT locus, PCR1                 | pjmatPiend<br>pjMat-intrev1    | TTATTCCGAATTGGAAAACAC<br>AATAACCTTCCTGTGCGG                             | 54                         | 4                    | 3                                         | 3796                  |
| Pj MAT locus, PCR2                 | pjMat-intfor2<br>pjMat-intrev2 | CACCAAATTTAGTTAGCAGAG<br>GTCACCATTTGGACCATC                             | 54                         | 4                    | 3                                         | 3491                  |
| Pj MAT locus, PCR2                 | pjMat-intfor3<br>pjmatMiend    | CATCGTGATATGGATTCTGC<br>TCAATGTGGCTCAGTAGAATATAC                        | 54                         | 4                    | 3                                         | 3082                  |
| Pj β-tubulin region                | 44                             | TCATTAGGTGGTGGAAACGGG                                                   | 56                         | 0.5                  | 3                                         | 289/                  |
| Surrounding intron no.6            | 45                             | ATCACCATATCCTGGATCCG                                                    |                            |                      |                                           | 241 no intron         |

<sup>a</sup> Pj, *P. jirovecii*. Pc, *P. carinii*. The proofreading high-fidelity expand polymerase (Roche Diagnostics) was used for all PCRs except the four used for amplification of the *MAT* locus which were carried out using the KAPA Long Range HotSart polymerase (KAPA biosystems).

<sup>b</sup> Restriction sites are underlined.
